# Supplementary material for: Epidemic features affecting the performance of outbreak detection algorithms
Source: PubMed Central journal article supplement (PMC3489582; doi:10.1186/1471-2458-12-418), 2012-06-08
Supplement: 1471-2458-12-418-S1.pdf [file 1471-2458-12-418-S1.pdf]

**Additional file 1: The optimized parameters for three algorithms, at a false alarm rate of 5%**

| Baseline counts | CUSUM |     | EWMA      |      | MPM  | False alarm rate (%) |
|-----------------|-------|-----|-----------|------|------|----------------------|
|                 | h     | k   | $\lambda$ | k    | c    |                      |
| 0.1             | 1.20  | 1.7 | 0.25      | 7.40 | 0.92 | 4.70~4.98            |
| 0.5             | 0.50  | 1.7 | 0.25      | 6.30 | 0.95 | 5.12~5.26            |
| 1.0             | 0.26  | 1.7 | 0.25      | 5.52 | 0.95 | 4.70~5.26            |
| 2.0             | 0.26  | 1.7 | 0.25      | 5.28 | 0.95 | 4.98~5.39            |
| 5.0             | 0.20  | 1.5 | 0.25      | 4.70 | 0.95 | 5.12~5.39            |
